# Supplementary material
Source: PubMed Central journal article supplement (PMC2539111)
Supplement: NIHMS63637-supplement-1si20050817_11.pdf [file NIHMS63637-supplement-1si20050817_11.pdf]

## Materials for Supporting Information

### Reduction-Alkylation Strategies for the Modification of Specific Monoclonal Antibody Disulfides

Michael M.C. Sun, Kevin S. Beam, Charles G. Cerveny, Kevin J. Hamblett, Richard S. Blackmore, Michael Y. Torgov, Felicia G.M. Handley, Peter D. Senter, and Stephen C. Alley\*

#### Contents:

Page 2. Figure S1. Mechanism used for the simulation of cAC10 partial reduction.

Page 3. Figure S2. Rate equations used for the simulation of cAC10 partial reduction.

Figure S1. Mechanism used for the simulation of cAC10 partial reduction.

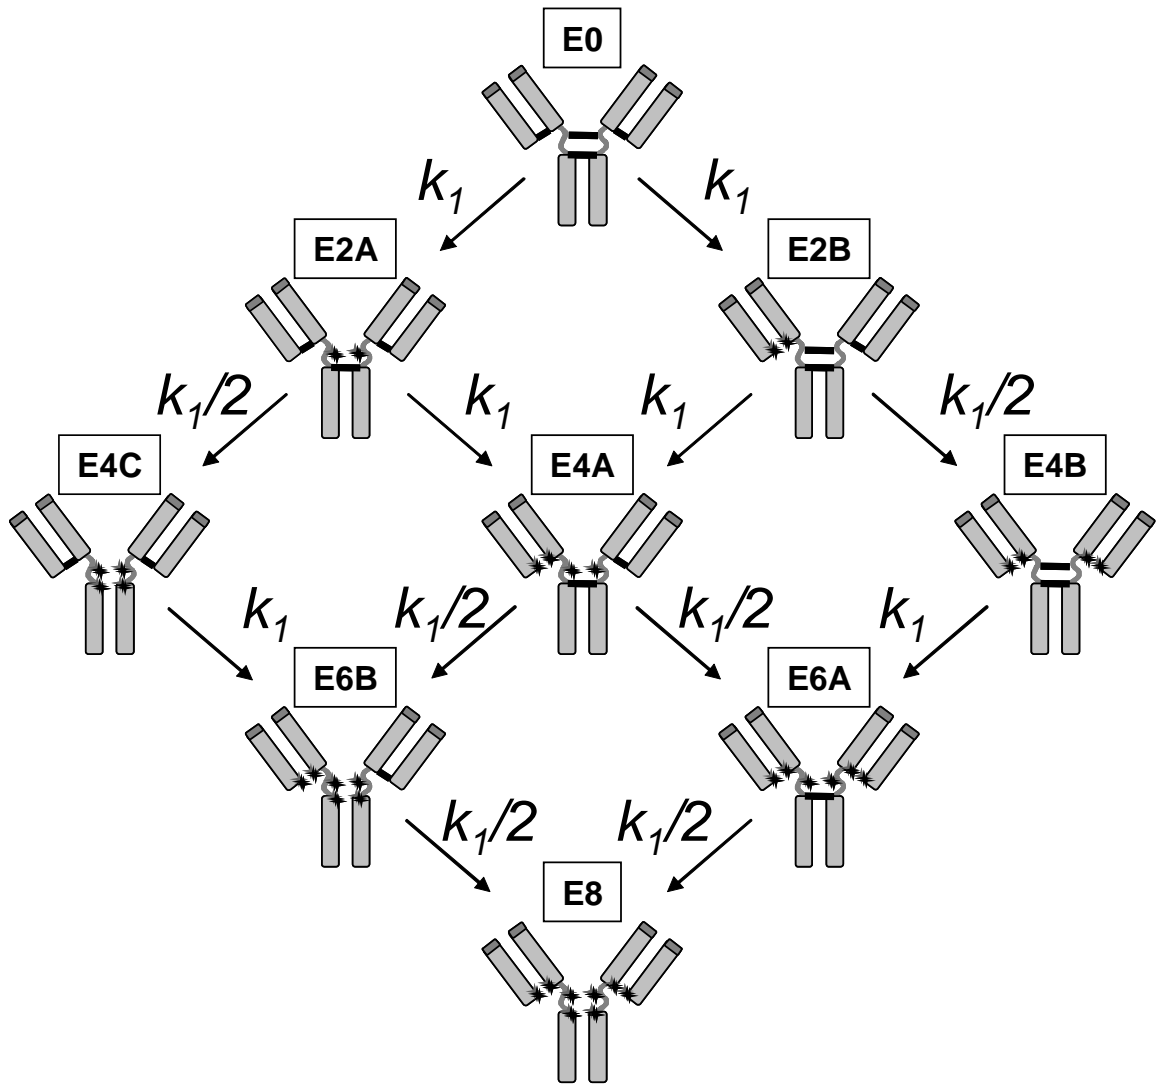

Figure S2. Rate equations used for the simulation of cAC10 partial reduction. The concentration of reductant is [R].

$$\frac{d[E0]}{dt} = -2(k_1[R][E0])$$

$$\frac{d[E2B]}{dt} = k_1[R][E0] - k_1[R][E2B] - \frac{k_1}{2}[R][E2B]$$

$$\frac{d[E2A]}{dt} = k_1[R][E0] - k_1[R][E2A] - \frac{k_1}{2}[R][E2A]$$

$$\frac{d[E4C]}{dt} = \frac{k_1}{2}[R][E2A] - k_1[R][E4C]$$

$$\frac{d[E4B]}{dt} = \frac{k_1}{2}[R][E2B] - k_1[R][E4B]$$

$$\frac{d[E4A]}{dt} = (k_1[R][E2B] + k_1[R][E2A]) - 2\left(\frac{k_1}{2}[R][E4A]\right)$$

$$\frac{d[E6B]}{dt} = \frac{k_1}{2}[R][E4A] + k_1[R][E4C] - \frac{k_1}{2}[R][E6B]$$

$$\frac{d[E6A]}{dt} = \frac{k_1}{2}[R][E4A] + k_1[R][E4B] - \frac{k_1}{2}[R][E6A]$$

$$\frac{d[E8]}{dt} = \frac{k_1}{2}[R][E6A] + \frac{k_1}{2}[R][E6B]$$

$$\begin{aligned} \frac{d[R]}{dt} = & -2(k_1[R][E0]) - k_1[R][E2B] - \frac{k_1}{2}[R][E2B] - k_1[R][E2A] - \frac{k_1}{2}[R][E2A] \\ & - k_1[R][E4C] - k_1[R][E4B] - 2\left(\frac{k_1}{2}[R][E4A]\right) - \frac{k_1}{2}[R][E6B] - \frac{k_1}{2}[R][E6A] \end{aligned}$$
